# Supplementary material for: A mixture of amino acids and other small molecules present in the serum suppresses the growth of murine and human tumors in vivo
Source: PubMed Central journal article supplement (PMC3562491; doi:10.1002/ijc.27756), 2012-08-01
Supplement: ijc0132-1213-SD3.pdf [file ijc0132-1213-SD3.pdf]

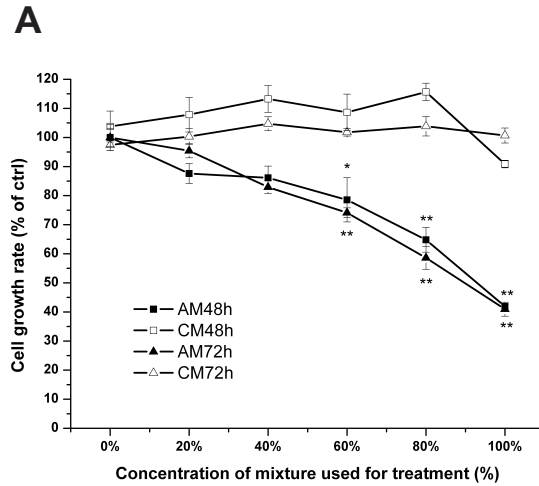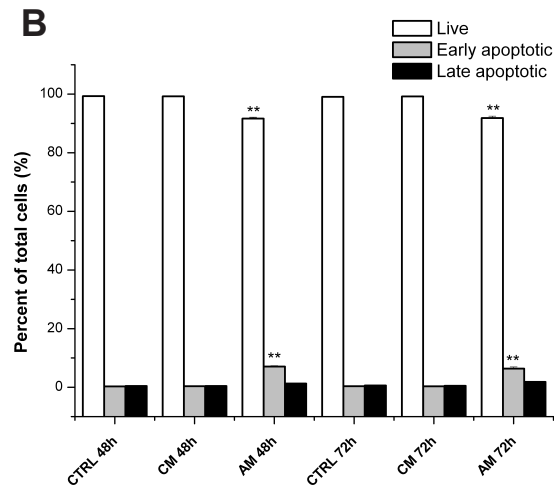

Supporting Information Figure S3. The AM inhibits the growth and induces apoptosis of human prostate carcinoma PC-3 cells in vitro. A, The effect of 48h or 72h treatment with the indicated concentration of CM or AM on cell proliferation as measured by WST-1 assay. \*  $P < 0.05$ ; \*\*  $P < 0.001$  (ANOVA). B, Percentage of live (Annexin V<sup>-</sup>/PI<sup>-</sup>), early apoptotic (Annexin V<sup>+</sup>/PI<sup>-</sup>) and late apoptotic (Annexin V<sup>+</sup>/PI<sup>+</sup>) cells after treatment with CM or AM. \*\*  $P < 0.001$  (ANOVA). Data are presented as mean  $\pm$  SEM of three independent experiments.
