# Supplementary material for: A mixture of amino acids and other small molecules present in the serum suppresses the growth of murine and human tumors in vivo
Source: PubMed Central journal article supplement (PMC3562491; doi:10.1002/ijc.27756), 2012-08-01
Supplement: ijc0132-1213-SD4.pdf [file ijc0132-1213-SD4.pdf]

Supporting Information Table 1. Primers used for real-time PCR amplification of selected genes.

| <b>Gene Symbol</b> | <b>Forward Primer (5'-3')</b> | <b>Reverse Primer ((5'-3')</b> |
|--------------------|-------------------------------|--------------------------------|
| APAF1              | TGCGCTGCTCTGCCTTCT            | CATGGGTAGCAGCTCCTTCTTC         |
| BAD                | GCTGTGCCTTGACTACGTAACATC      | TGCTCACTCGGCTCAAACCTCT         |
| BAK1               | CACGGCAGAGAATGCCTATGA         | CCCAATTGATGCCACTCTCA           |
| BAX                | GGTTGTCGCCCTTTTCTACTTTG       | CAGTTCGGCACCTTGGT              |
| BCL2               | CCGCATCAGGAAGGCTAGAG          | CTGGGACACAGGCAGGTTCT           |
| BCL2L1             | GATTGCCTTTGTTTTGATGTTTGT      | GGAAAGGGAACCCAGGTTAGTG         |
| BCL2L11            | GCCGCCACTACCACCACTT           | AACCGAATACCGCGATGATG           |
| BID                | GCTGTATAGCTGCTTCCAGTGTAGA     | GCTATCTTCCAGCCTGTCTTCTCT       |
| BIK                | TGATGGAGACCCTCCTGTATGAG       | AGAGTCAGTCATGCCAAGAACCT        |
| BIRC2              | AGTAACTGGGAACCAAAGGATGAT      | CATGTGTCTGCATGCTCAGATTT        |
| BIRC3              | TGGTTTCCAAGGTGTGAGTACTTG      | GGGCTGTCTGATGTGGATAGC          |
| BIRC5              | CCCCTCGGGCCAACTG              | GTTTGGCTTGCTGGTCTCTTCT         |
| BIRC6              | AGCCGAAGGATAGCGATCAG          | TAGCCCGGAAGACGAAGAAA           |
| CASP1              | TCACTGCTTCGGACATGACTACA       | GGAACGTGCTGTGACAGAGTCTT        |
| CASP2              | TGAGCTGTGACTACGACTTGAGTCT     | GTCGACAGGCGGAGCTTCT            |
| CASP3              | CAGTGGAGGCCGACTTCTTG          | ATGAACCAGGAGCCATCCTTT          |
| CASP4              | TTTCTGGCAATTGAAAATGG          | AAGGTGCTCCTTGAAGTTGATTAAG      |
| CASP5              | CGGAAGGTACAGAAATCATTGAA       | GTCAAGGTTGCTCGTTCTATGGT        |
| CASP6              | TGGATGCAGCCTCCGTTTAC          | TCCCGGTGAGAATAATATCCTTCT       |
| CASP7              | CGGAGCGACGGAGAGAGA            | AACCAACACAGTCCATTACAGCAT       |
| CASP8              | CTTTGACCACGACCTTTGAAGAG       | GTGGTCCATGAGTTGGTAGATTTTC      |
| CASP9              | ACTGGCTCCAACATCGACTGT         | TTCACCTCCACCATGAAATGC          |
| CASP10             | GGCCCTCATTCCCATTCG            | GGTTCAGAGCATCTGCTTCGA          |
| CASP14             | TCGAAAGCACCATGAAAAGAGA        | GGCCTGCTGGAATTTTTCC            |
| CDKN1A             | GCGGCAGACCAGCATGA             | ATTAGGGCTTCTCTTGGAGAAG         |
| CDKN2A             | GCCTTTTCACTGTGTTGGAGTTT       | CGCAAGAAATGCCACATG             |
| CHUK               | CGGGCCCTGGGAGATG              | ATCGTTCTCTGTTTTTGGTACTTAGCT    |
| DAPK1              | GCTGCTGAGGAGCTTTTTAG          | GGTGGGAACCTGCTGGAGTT           |
| DIABLO             | AATCACATTAGCTGGTGAAACTG       | TGCCAGCTTGGTTTCTGCTT           |
| IKBKB              | TCTGCGCTTAGATACCTTCATGAA      | CTTGCTGCAGGACGATGTTTT          |
| IKBKE              | CTCGCCGCTCCCATAG              | CCCCTCGAGAGCTCTTG              |
| IKBKG              | CTGTCCCAAGTGCCAGTATCAG        | CCGGCCCTACTCAATGCA             |
| NFKB1              | GGCTACACCGAAGCAATTGAA         | CAGCGAGTGGGCCTGAGA             |
| NFKBIA             | GCTGAAGAAGGAGCGGCTACT         | TCGTAACCTCGTCTTTTATGGA         |
| NFKBIB             | TCATCAGCATGAACCTTCTCT         | GGTCATTCTGCAGGTCCATGT          |
| NFKBIE             | CCCGTTCCTCACCTTCGA            | CTGGTTTATTGCCCATGCT            |
| NFKBIZ             | ACCAGGCTTCCCTGTACCAGTA        | CCAGAGTTGGTTTGTGGGTGTA         |
| REL                | GCCCATCTCAAGTGGATTGTC         | GCCACTGATGACCAGCTTGAA          |
| RELA               | GCCGGGATGGCTTCTATGA           | TGGATTCCAGGTTCTGGAA            |
| RELB               | GACCCCATGGCATCGA              | CGTGGTTGGGCAGGAAGT             |
| XIAP               | GGAGTGCAATGGCACAATCTT         | CCGTGGAGCATGCCTGTAGT           |
